# Supplementary material for: Preparation of ultramarine green pigments by recycling of the discarded molecular sieves for green vegetation spectral simulation
Source: Research Square preprint supplement (doi:10.21203/rs.3.rs-5355057/v1), 2024-12-05
Supplement: Supplementary file 1 [file b49b726f237b9d0cd0ca529b.docx]

**Supporting Information**

**Preparation of ultramarine green pigments by recycling of the discarded molecular sieves for green vegetation spectral simulation**

*Haoyan Zhou1,2, Mei Zu1, *, XinxuanTang1, Yuanxi Chang1, Shiquan Li1,* *Hongrui Yang1, Chenglong Lv2, *, Haifeng Cheng1*

*1Science and Technology on Advanced Ceramic Fibers and Composites Laboratory, National University of Defense Technology, Changsha 410073, China*

*2School of Physics and Optoelectronics Engineering,* *Xiangtan University, Xiangtan* *411105, China*

*Email: [zumei2003@163.com](mailto:zumei2003@163.com) (Mei Zu);*

These SEM results further demonstrated that discarded molecular sieves contained sodalite structure with a rhombic shape which was confirmed the previous analysis of the crystalline phase1,2 (**Fig. S1, S2**).From the particle size distribution graph, it can be observed that the particle size of all the samples is normally distributed, the smoothness and flatness of a coating is highly dependent on the uniform distribution of pigment particles, The uniformity of the pigment affects the apparent properties of the coating3. It can be observed from **Fig. S3** that most of the particle sizes in the samples are below 5 μm and uniformly distributed. Based on the above D50 studies, it can be concluded that the increase in sodium carbonate content results in a larger particle size of the pigment, which is in agreement with SEM results. The SOD structure has excellent thermal stability and is expected to solve the problem of poor weather resistance of hyperspectral materials4 (as pretend in **Fig. S4**). Herein, this green pigment without heavy metals is expected to replace cobalt green, chrome green and other metallic colors in the camouflage pigments from the perspective of the economy and environmental protection.

**Fig. S1.** SEM images of discarded molecular sieves.


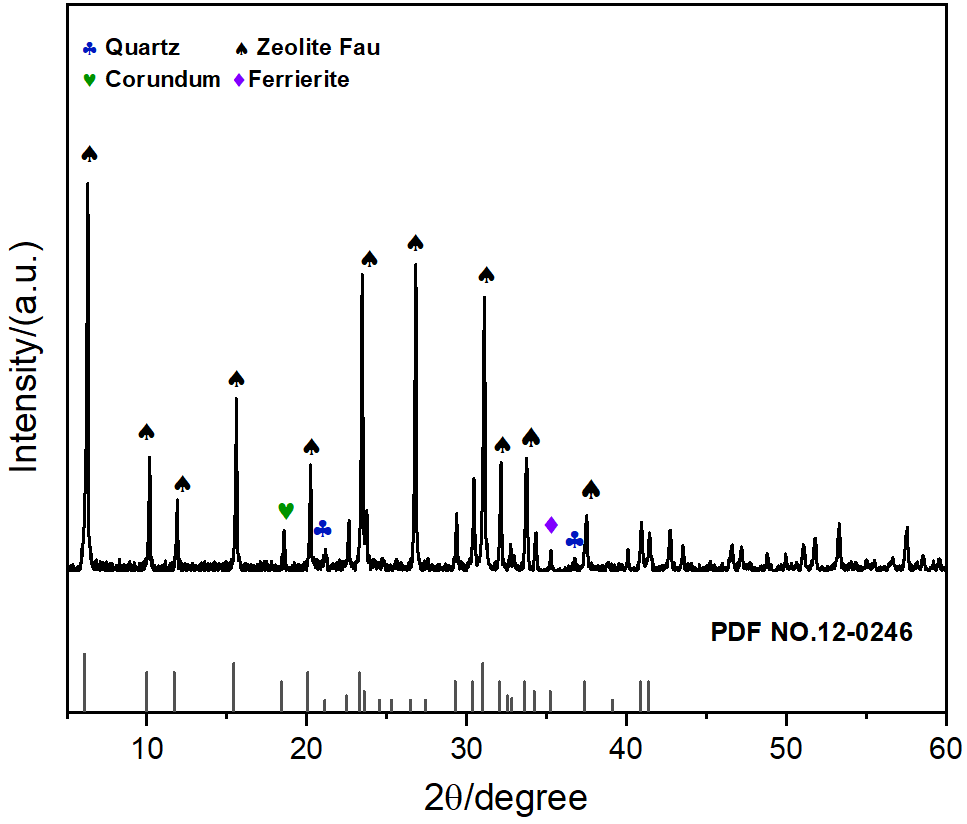


**Fig. S2.** XRD pattern of discarded molecular sieves.


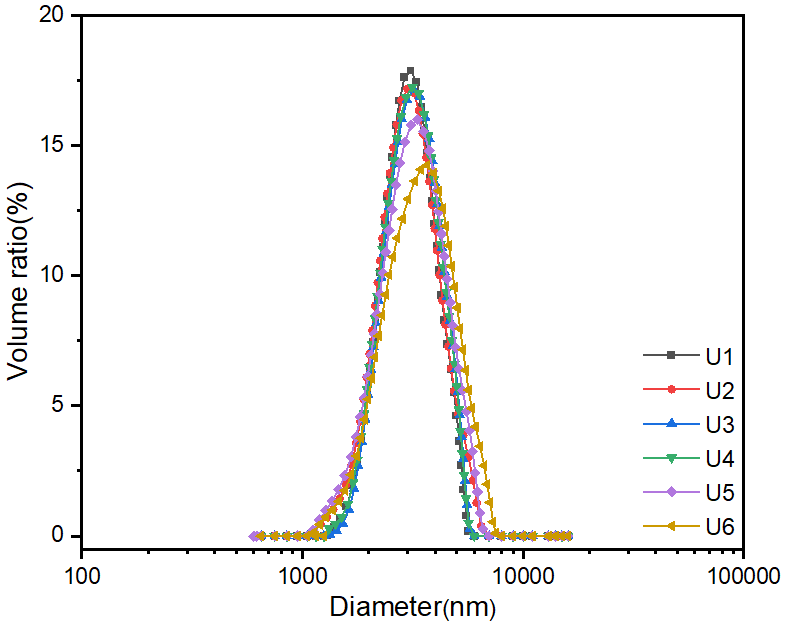


**Fig. S3.** Particle size analyses of ultramarine.

**Fig. S4.** TG/DTG curve of U5 sample.


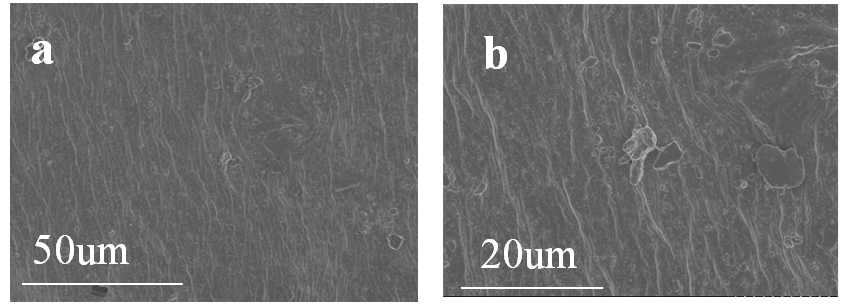


**Fig. S5.** SEM images of camouflage coating.

**References**

1 Hsiao, Y.-H., Shen, Y.-H. & Ray, D.-T. Synthesis of Ultramarine from Reservoir Silts. *Minerals* **7**, doi:10.3390/min7050069 (2017).

2 Kowalak, S., Jankowska, A. & Zeidler, S. Ultramarine analogs synthesized from cancrinite. *Microporous and Mesoporous Materials* **93**, 111-118, doi:10.1016/j.micromeso.2006.02.011 (2006).

3 Zhang, M., Feng, L., Zeng, Z., Yang, Y. & Sun, X. Environmentally Friendly High-Near-Infrared Reflectance Blue Pigment YIn0.9–xMn0.1MxO3−δ Based on Li/Zn Doping. *ACS Sustainable Chemistry & Engineering* **10**, 13877-13886, doi:10.1021/acssuschemeng.2c04967 (2022).

4 Škvarlová, A. *et al.* Preparation and characterization of ultramarine blue pigments from fly ash by using the X-ray photoelectron spectroscopy (XPS) for the determination of chemical states of sulphur in chromophores. *Microporous and Mesoporous Materials* **284**, 283-288, doi:10.1016/j.micromeso.2019.04.039 (2019).
